# Supplementary material for: Prediction of structures and properties of 2,4,6-triamino-1,3,5-triazine-1,3,5-trioxide (MTO) and 2,4,6-trinitro-1,3,5-triazine-1,3,5-trioxide (MTO3N) green energetic materials from DFT and ReaxFF molecular modeling
Source: Royal Society of Chemistry journal article supplement (doi:10.1039/c5ta06426k), 2015-11-09
Supplement: c5ta06426k1.pdf [file c5ta06426k1.pdf]

## **Supporting Information**

Predictions of structures and properties of 2,4,6-triamino-1,3,5-triazine-1,3,5-trioxide (MTO) and 2,4,6-trinitro-1,3,5-triazine-1,3,5-trioxide (MTO3N) green energetic materials from DFT and ReaxFF molecular modeling

Saber Naserifar<sup>1</sup>, Sergey Zybin<sup>1</sup>, Cai-Chao Ye<sup>1,2</sup>, and William A. Goddard III<sup>1\*</sup>

<sup>1</sup>Materials and Process Simulation Center, California Institute of Technology, Pasadena, California 91125

<sup>2</sup>Key Laboratory of Soft Chemistry and Functional Materials of MOE, School of Chemical Engineering, Nanjing University of Science and Technology, Nanjing 210094, P. R. China

\*E-mail: wag@wag.caltech.edu

We present the cell size information and xyz coordinates of the atoms for the most stable crystal structures of MTO and MTO3N obtained from cell optimization using periodic DFT calculations (PBE-ulg and PBE-D2).

1) MTO crystals

a) PBE-ulg

36

# P21, a=4.5919, b= 6.9724,c= 10.0139, alpha= 90.0000, beta= 103.6406, gamma= 90.0000

|   |           |          |          |
|---|-----------|----------|----------|
| C | 0.258585  | 6.964800 | 6.128380 |
| C | 1.971728  | 3.478530 | 3.603069 |
| C | -1.445291 | 5.967120 | 7.463729 |
| C | 3.675605  | 2.480919 | 2.267720 |
| C | -0.488872 | 1.057504 | 8.128193 |
| C | 2.719186  | 4.543704 | 1.603256 |
| N | 1.062488  | 6.909579 | 5.097138 |
| N | 1.167826  | 3.423379 | 4.634311 |
| N | 2.316763  | 4.941619 | 7.653882 |
| N | -0.086450 | 1.455419 | 2.077567 |
| N | -0.391880 | 2.071779 | 8.977553 |
| N | 2.622193  | 5.557979 | 0.753895 |
| N | -1.361977 | 0.030051 | 8.342772 |
| N | 3.592290  | 3.516251 | 1.388678 |
| N | 0.359413  | 0.991684 | 7.062600 |
| N | 1.870900  | 4.477884 | 2.668850 |
| N | -0.694636 | 6.000587 | 6.327583 |
| N | 2.924949  | 2.514387 | 3.403866 |
| H | 1.771217  | 0.681831 | 4.911073 |
| H | 0.459097  | 4.168031 | 4.820376 |
| H | 0.928085  | 6.196302 | 4.348011 |
| H | 1.302229  | 2.710102 | 5.383438 |
| H | 2.419459  | 4.215722 | 6.942708 |
| H | -0.189146 | 0.729522 | 2.788742 |
| H | 2.080825  | 4.641876 | 8.614765 |
| H | 0.149488  | 1.155675 | 1.116684 |
| H | 0.397307  | 2.701944 | 8.807351 |
| H | 1.832983  | 6.188075 | 0.924196 |
| H | -1.218267 | 2.402689 | 9.499160 |
| H | 3.448580  | 5.888889 | 0.232290 |
| O | 1.291146  | 1.933656 | 6.921104 |
| O | 0.939168  | 5.419856 | 2.810345 |
| O | -0.849461 | 5.022569 | 5.443870 |
| O | 3.079775  | 1.536368 | 4.287579 |
| O | -2.119143 | 0.020359 | 9.453713 |
| O | 4.349457  | 3.506559 | 0.277736 |

b) PBE-D2

36

# P21, a= 4.5047, b= 6.9121, c= 9.9978, alpha= 90.0000, beta= 104.3649, gamma= 90.0000

|   |           |          |          |
|---|-----------|----------|----------|
| C | 0.156986  | 6.897792 | 6.097718 |
| C | 1.867295  | 3.441742 | 3.587503 |
| C | -1.575721 | 5.914684 | 7.410841 |
| C | 3.600002  | 2.458634 | 2.274381 |
| C | -0.598549 | 1.054925 | 8.093262 |
| C | 2.622831  | 4.510975 | 1.591960 |
| N | 0.971120  | 6.835237 | 5.075250 |
| N | 1.053136  | 3.379187 | 4.610069 |
| N | 2.078577  | 4.903167 | 7.596603 |
| N | -0.054296 | 1.447117 | 2.088618 |
| N | -0.510194 | 2.063884 | 8.948564 |
| N | 2.534451  | 5.519934 | 0.736755 |
| N | -1.487561 | 0.036427 | 8.292583 |
| N | 3.511842  | 3.492477 | 1.392638 |
| N | 0.261243  | 0.982071 | 7.036217 |
| N | 1.763038  | 4.438121 | 2.649005 |
| N | -0.810979 | 5.943300 | 6.283093 |
| N | 2.835261  | 2.487250 | 3.402128 |
| H | 1.685214  | 0.667018 | 4.893167 |
| H | 0.339068  | 4.123067 | 4.792054 |
| H | 0.828842  | 6.127991 | 4.319512 |
| H | 1.195439  | 2.671941 | 5.365709 |
| H | 2.161633  | 4.166544 | 6.893069 |
| H | -0.137352 | 0.710495 | 2.792152 |
| H | 1.846934  | 4.608781 | 8.561252 |
| H | 0.177348  | 1.152731 | 1.123970 |
| H | 0.293272  | 2.688116 | 8.821010 |
| H | 1.731009  | 6.144166 | 0.864212 |
| H | -1.341405 | 2.386541 | 9.469048 |
| H | 3.365687  | 5.842590 | 0.216174 |
| O | 1.205010  | 1.914513 | 6.903820 |
| O | 0.819271  | 5.370563 | 2.781402 |
| O | -0.968022 | 4.974707 | 5.390116 |
| O | 2.992303  | 1.518658 | 4.295105 |
| O | -2.265181 | 0.043270 | 9.389532 |
| O | 4.289463  | 3.499320 | 0.295690 |

## 2) MTO3N crystals

### a) PBE-ulg

72

# P21/C, a= 11.4519, b= 9.0169, c= 8.4758, alpha= 90.0000, beta= 83.8774, gamma= 90.0000

|   |           |          |          |
|---|-----------|----------|----------|
| C | 3.062280  | 8.356592 | 2.681531 |
| C | 9.490843  | 0.660308 | 2.288409 |
| C | 6.057955  | 3.848142 | 4.773378 |
| C | 6.495168  | 5.168848 | 0.196561 |
| C | 1.049446  | 0.604222 | 2.647139 |
| C | 11.503677 | 8.412678 | 2.322800 |
| C | 8.070789  | 5.112672 | 4.807770 |
| C | 4.482334  | 3.904228 | 0.162169 |
| C | 1.170379  | 7.510987 | 1.605986 |
| C | 11.382744 | 1.505912 | 3.363953 |
| C | 14.815632 | 3.002537 | 0.878983 |
| C | -2.262509 | 6.014363 | 4.090956 |
| N | 4.491249  | 8.257857 | 2.964121 |
| N | 8.061874  | 0.759043 | 2.005818 |
| N | 4.628986  | 3.749407 | 4.490788 |
| N | 7.924137  | 5.267493 | 0.479152 |
| N | 0.240791  | 1.724121 | 3.116251 |
| N | 12.312332 | 7.292779 | 1.853688 |
| N | 8.879444  | 6.232571 | 4.338657 |
| N | 3.673679  | 2.784328 | 0.631282 |
| N | 0.485693  | 6.403802 | 0.912829 |
| N | 12.067430 | 2.613097 | 4.057111 |
| N | 15.500318 | 1.895352 | 1.572141 |
| N | -2.947195 | 7.121548 | 3.397798 |
| N | 0.463243  | 8.650272 | 1.852048 |
| N | 12.089879 | 0.366627 | 3.117891 |
| N | 15.522767 | 4.141823 | 0.632922 |
| N | -2.969645 | 4.875077 | 4.337018 |
| N | 2.459976  | 7.333354 | 1.992697 |
| N | 10.093147 | 1.683636 | 2.977242 |
| N | 13.526035 | 2.824905 | 0.492272 |
| N | -0.972911 | 6.192086 | 4.477667 |
| N | 2.363391  | 0.463559 | 3.073858 |
| N | 10.189733 | 8.553341 | 1.896081 |
| N | 6.756844  | 4.972009 | 4.381051 |
| N | 5.796279  | 4.044891 | 0.588888 |
| O | 4.846768  | 8.447663 | 4.125944 |
| O | 7.706355  | 0.569237 | 0.843995 |
| O | 4.273467  | 3.939213 | 3.328965 |
| O | 8.279656  | 5.077687 | 1.640975 |
| O | 5.205591  | 8.002950 | 1.992995 |
| O | 7.347464  | 1.013950 | 2.976994 |
| O | 10.780352 | 3.494500 | 0.492024 |
| O | 1.772772  | 5.522400 | 4.477915 |
| O | -0.935556 | 1.463262 | 3.383435 |

|   |           |          |          |
|---|-----------|----------|----------|
| O | 13.488679 | 7.553638 | 1.586504 |
| O | 10.055791 | 5.971713 | 4.071474 |
| O | 2.497331  | 3.045187 | 0.898466 |
| O | 0.795913  | 2.820667 | 3.222708 |
| O | 11.757403 | 6.196233 | 1.747232 |
| O | 8.324516  | 7.329117 | 4.232202 |
| O | 4.228801  | 1.687783 | 0.737738 |
| O | -0.037649 | 5.567485 | 1.644205 |
| O | 12.590773 | 3.449415 | 3.325734 |
| O | 16.023661 | 1.059035 | 0.840765 |
| O | -3.470537 | 7.957865 | 4.129175 |
| O | -6.352120 | 6.432476 | 4.657578 |
| O | 18.905243 | 2.584424 | 0.312361 |
| O | 15.472356 | 1.924026 | 2.797330 |
| O | -2.919232 | 7.092874 | 2.172609 |
| O | 3.062974  | 6.253401 | 1.721090 |
| O | 9.490149  | 2.763499 | 3.248849 |
| O | 12.923037 | 1.744950 | 0.763880 |
| O | -0.369914 | 7.271949 | 4.206059 |
| O | 2.922324  | 1.335042 | 3.785652 |
| O | 9.630800  | 7.681858 | 1.184287 |
| O | 6.197912  | 5.843493 | 3.669256 |
| O | 6.355212  | 3.173408 | 1.300683 |
| O | -0.697671 | 8.761992 | 1.369516 |
| O | 13.250793 | 0.254998 | 3.600423 |
| O | 16.683681 | 4.253542 | 1.115453 |
| O | -4.130559 | 4.763448 | 3.854486 |

b) PBE-D2

72

# P21/C, a= 11.2408, b= 8.9167, c= 8.3575, alpha= 90.0000, beta= 84.5057, gamma= 90.0000

|   |           |          |          |
|---|-----------|----------|----------|
| C | 3.044603  | 8.268813 | 2.630007 |
| C | 9.387772  | 0.647887 | 2.233082 |
| C | 5.989310  | 3.810374 | 4.664626 |
| C | 6.443065  | 5.106238 | 0.198463 |
| C | 1.032783  | 0.624169 | 2.600050 |
| C | 11.399591 | 8.292531 | 2.263038 |
| C | 8.001129  | 5.082519 | 4.694582 |
| C | 4.431245  | 3.834181 | 0.168506 |
| C | 1.151148  | 7.434210 | 1.548845 |
| C | 11.281227 | 1.482491 | 3.314243 |
| C | 14.679689 | 2.975860 | 0.882699 |
| C | -2.247314 | 5.940841 | 3.980389 |
| N | 4.480048  | 8.173047 | 2.891155 |
| N | 7.952327  | 0.743653 | 1.971934 |
| N | 4.553865  | 3.714697 | 4.403478 |
| N | 7.878510  | 5.202003 | 0.459610 |
| N | 0.225813  | 1.742591 | 3.082079 |
| N | 12.206563 | 7.174110 | 1.781009 |
| N | 8.808101  | 6.200941 | 4.212553 |
| N | 3.624275  | 2.715759 | 0.650535 |
| N | 0.458814  | 6.322208 | 0.868693 |
| N | 11.973560 | 2.594492 | 3.994395 |
| N | 15.372023 | 1.863858 | 1.562851 |
| N | -2.939648 | 7.052843 | 3.300237 |
| N | 0.447309  | 8.576350 | 1.794188 |
| N | 11.985065 | 0.340350 | 3.068900 |
| N | 15.383527 | 4.118000 | 0.637356 |
| N | -2.951154 | 4.798700 | 4.225732 |
| N | 2.438824  | 7.248386 | 1.939108 |
| N | 9.993551  | 1.668315 | 2.923980 |
| N | 13.392014 | 2.790035 | 0.492436 |
| N | -0.959639 | 6.126665 | 4.370652 |
| N | 2.344119  | 0.470891 | 3.035296 |
| N | 10.088255 | 8.445809 | 1.827792 |
| N | 6.689793  | 4.929241 | 4.259336 |
| N | 5.742581  | 3.987459 | 0.603752 |
| O | 4.856588  | 8.363152 | 4.046138 |
| O | 7.575788  | 0.553549 | 0.816950 |
| O | 4.177325  | 3.904801 | 3.248494 |
| O | 8.255050  | 5.011899 | 1.614594 |
| O | 5.178329  | 7.921062 | 1.908081 |
| O | 7.254046  | 0.995639 | 2.955007 |
| O | 10.652509 | 3.462711 | 0.523463 |
| O | 1.779866  | 5.453989 | 4.339625 |
| O | -0.955962 | 1.489000 | 3.331750 |
| O | 13.388337 | 7.427611 | 1.531338 |
| O | 9.989875  | 5.947439 | 3.962882 |

|   |           |          |          |
|---|-----------|----------|----------|
| O | 2.442500  | 2.969350 | 0.900206 |
| O | 0.786469  | 2.833103 | 3.219024 |
| O | 11.645906 | 6.083597 | 1.644064 |
| O | 8.247444  | 7.291453 | 4.075608 |
| O | 4.184932  | 1.625247 | 0.787480 |
| O | -0.058768 | 5.493669 | 1.612551 |
| O | 12.491142 | 3.423032 | 3.250537 |
| O | 15.889605 | 1.035318 | 0.818993 |
| O | -3.457230 | 7.881382 | 4.044096 |
| O | 12.909040 | 6.338258 | 4.506770 |
| O | -0.476666 | 2.578442 | 0.356318 |
| O | -3.875129 | 1.879908 | 2.787863 |
| O | 16.307503 | 7.036793 | 2.075226 |
| O | 3.037149  | 6.166344 | 1.667310 |
| O | 9.395227  | 2.750356 | 3.195778 |
| O | 12.793690 | 1.707994 | 0.764234 |
| O | -0.361313 | 7.208706 | 4.098854 |
| O | 2.901282  | 1.329391 | 3.764419 |
| O | 9.531093  | 7.587309 | 1.098669 |
| O | 6.132630  | 5.787741 | 3.530213 |
| O | 6.299744  | 3.128959 | 1.332875 |
| O | -0.711613 | 8.690038 | 1.307539 |
| O | 13.143987 | 0.226663 | 3.555550 |
| O | 16.542450 | 4.231688 | 1.124006 |
| O | -4.110075 | 4.685013 | 3.739083 |
